# Supplementary material
Source: PubMed Central journal article supplement (PMC8597981)
Supplement: NIHMS1701743-supplement-1.pdf [file NIHMS1701743-supplement-1.pdf]

## **Supplementary Information**

- Supplementary Figures 1-8
- Supplementary Figures legends
- Supplementary Materials and Methods
- Supplementary Table 1 (Primer information)
- Supplementary Table 2 (Antibody information)
- Supplementary Table 3 (Gene list of DEGs in excel file)
- Supplementary References

**A**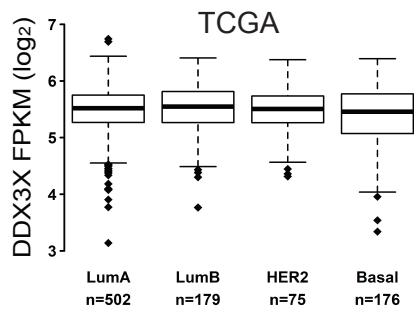**B**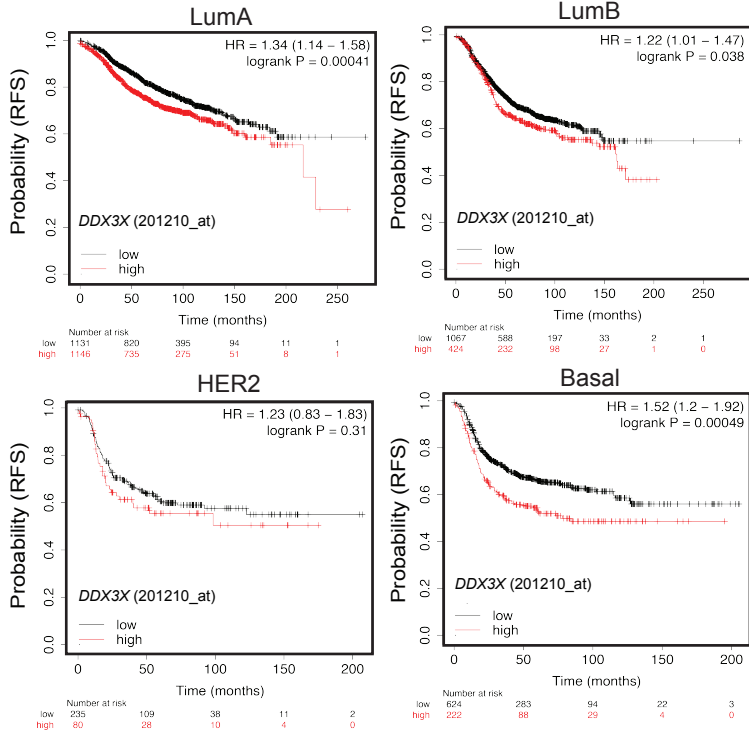**C**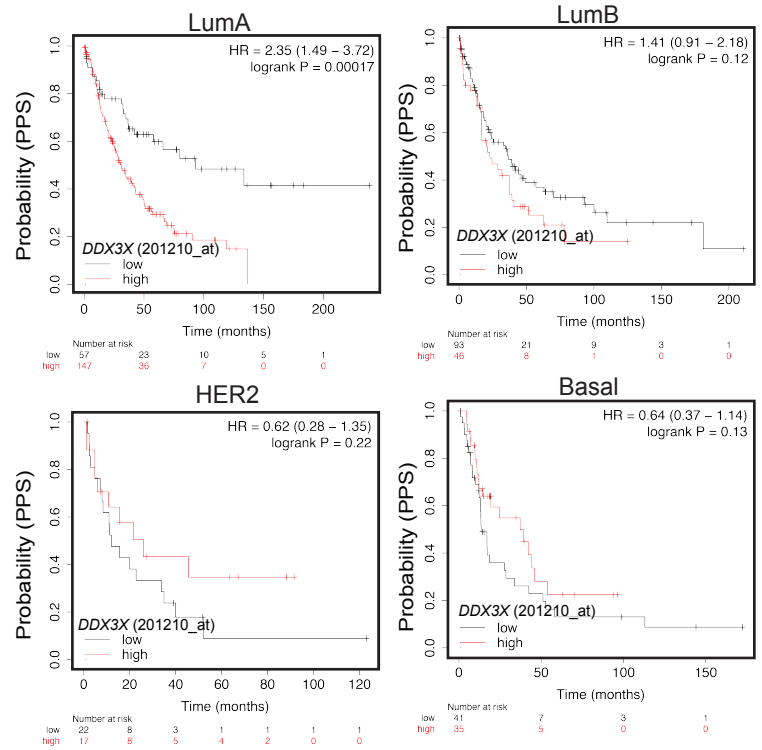**D**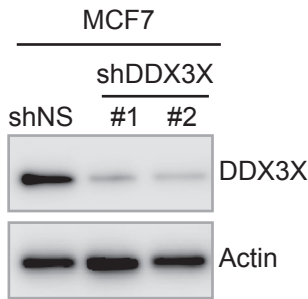**F**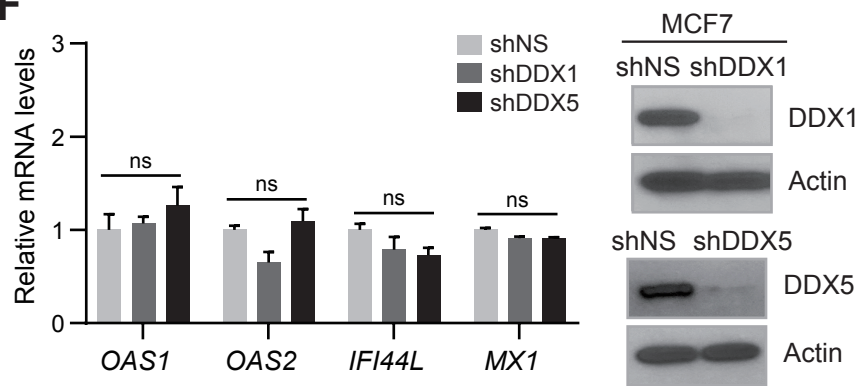**E**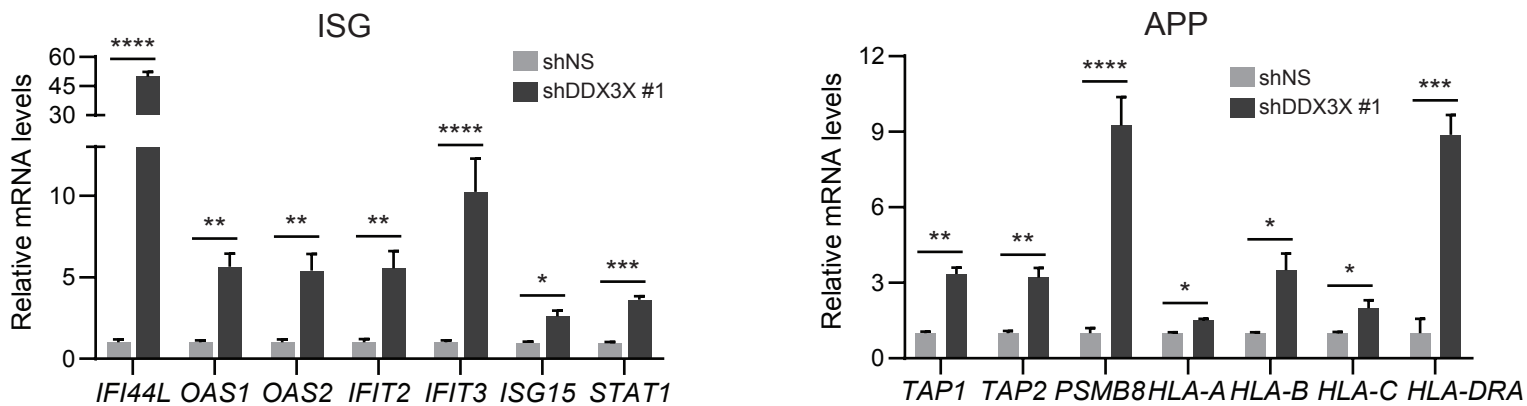



**Supplementary Figure 1. High expression of DDX3X correlates with worse prognosis and knockdown of DDX3X upregulates genes in the antiviral innate immune response.**

- A.** The level of *DDX3X* transcript in luminal A, luminal B, HER2+, and basal-like breast cancer patients (TCGA), Fragments per Kilobase of transcript per Million mapped reads (FPKM).
- B.** Relapse-free survival (RFS) analysis of *DDX3X* in luminal A, luminal B, HER2+, and basal-like breast cancer patients.
- C.** Post-progression survival (PPS) analysis of *DDX3X* in luminal A, luminal B, HER2+, and basal-like breast cancer patients.
- D.** Western blot analysis of *DDX3X* knockdown by two different shRNAs (shDDX3X\_#1, #2) in MCF7 cells. shNS, non-specific shRNA.
- E.** qRT-PCR of ISGs and APP genes in *DDX3X*-control or -KD (shDDX3X\_#1) MCF7 cells.
- F.** qRT-PCR of ISGs in *DDX1*-KD or *DDX5*-KD MCF7 cells.

Data are shown as mean  $\pm$  SEM of three independent experiments. Statistical significance was calculated using unpaired t-tests. \* $p < 0.05$ ; \*\* $p < 0.01$ ; \*\*\* $p < 0.001$ ; \*\*\*\* $p < 0.0001$ ; ns, not significant.

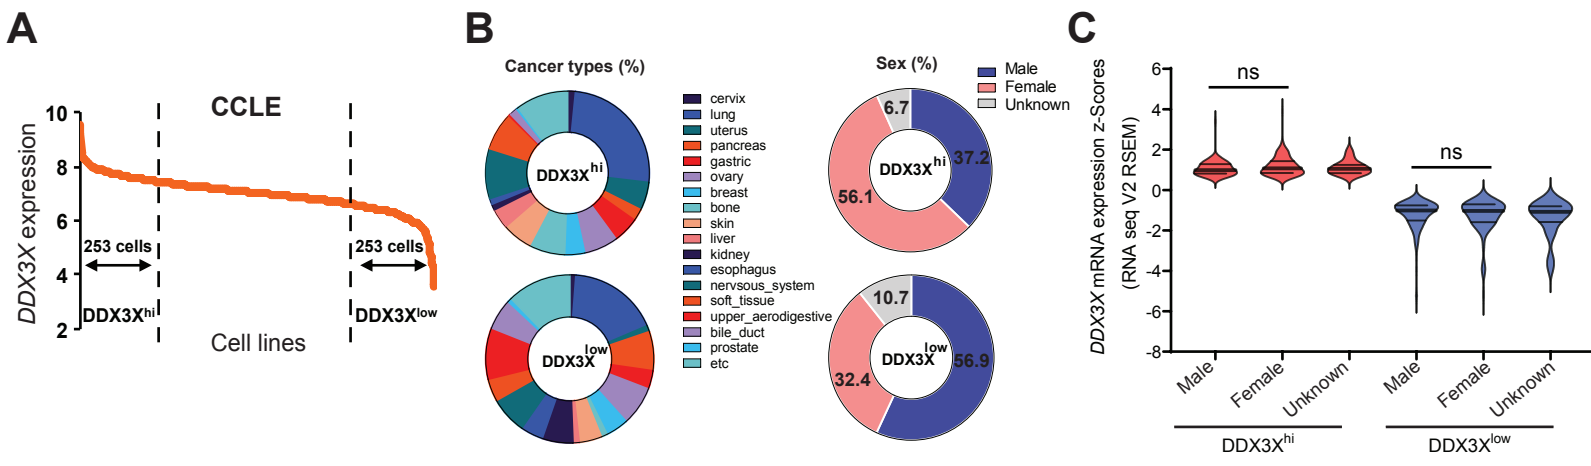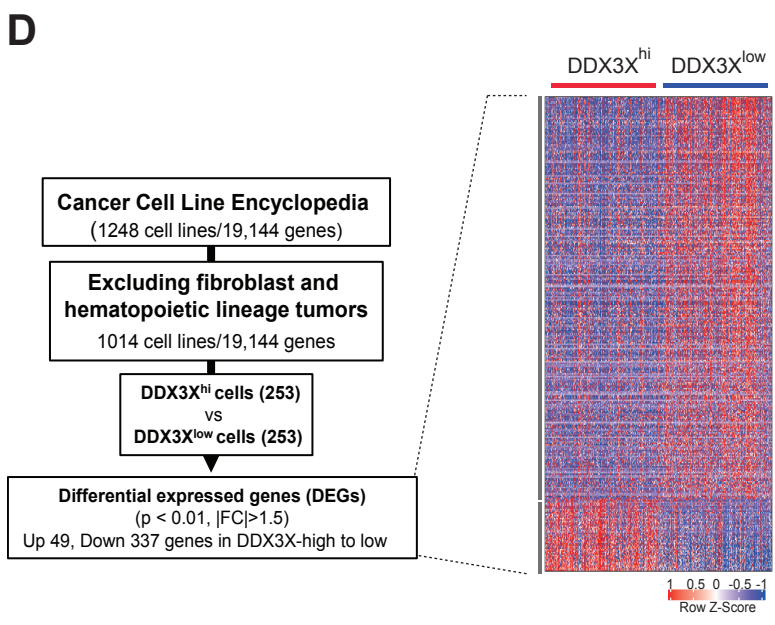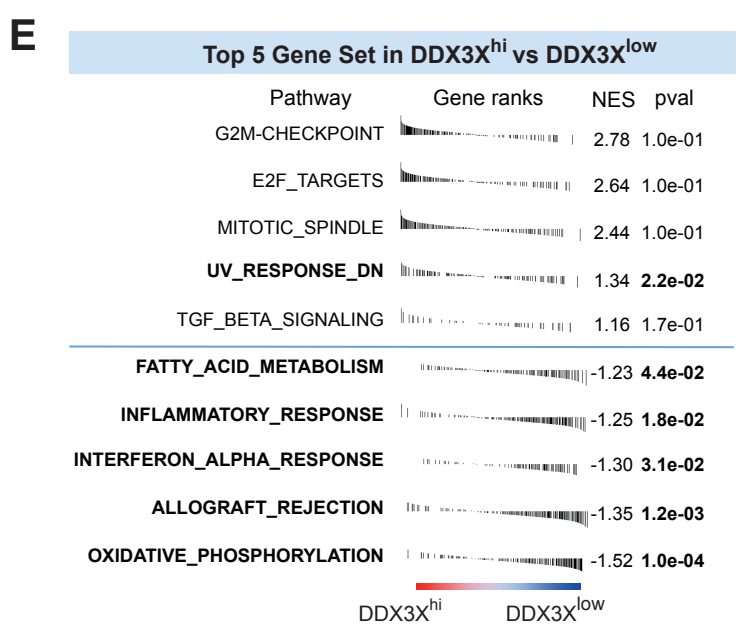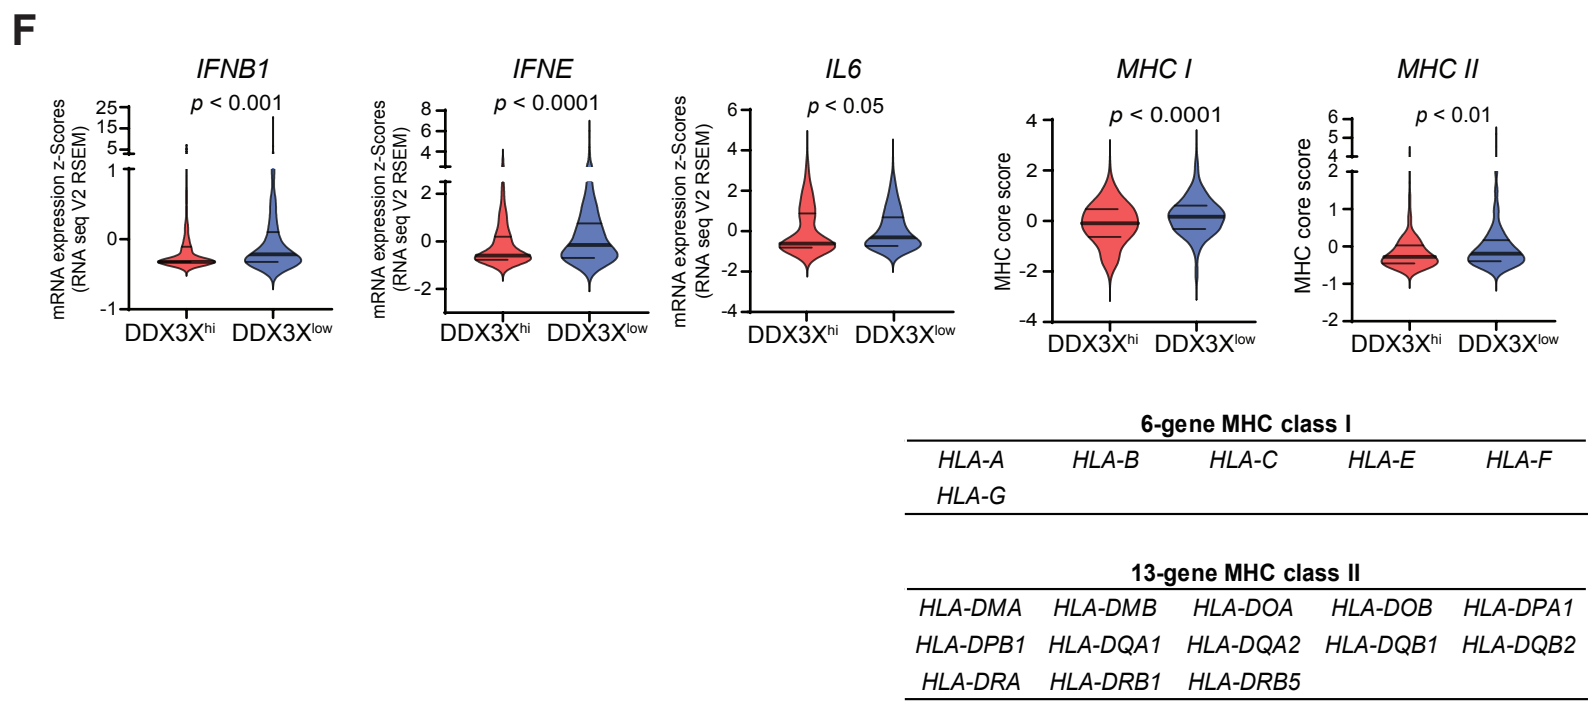

**Supplementary Figure 2. Low DDX3X expression is related to chronic activation of the innate antiviral immune response in various cancer cell lines.**

- A. DDX3X<sup>hi</sup> and DDX3X<sup>low</sup> cancer cells in CCLE.
- B. Cancer type and sex of cancer cells in DDX3X<sup>hi</sup> and DDX3X<sup>low</sup> group.
- C. *DDX3X* transcript level in each group defined by sex in DDX3X<sup>hi</sup> and DDX3X<sup>low</sup> group.
- D. Flowchart leading to the identification of differentially expressed genes (DEGs) between DDX3X<sup>hi</sup> and DDX3X<sup>low</sup> cells.
- E. Gene set enrichment analysis (GSEA) plots with the Molecular Signatures Database (MSigDB). (Significantly enriched gene sets are highlighted in bold)
- F. Violin plots showing transcript levels of MHC I, MHC II, IFNs, interleukin 6 genes in DDX3X<sup>hi</sup> and DDX3X<sup>low</sup> group. MHC genes used in calculation of MHC core score (below).

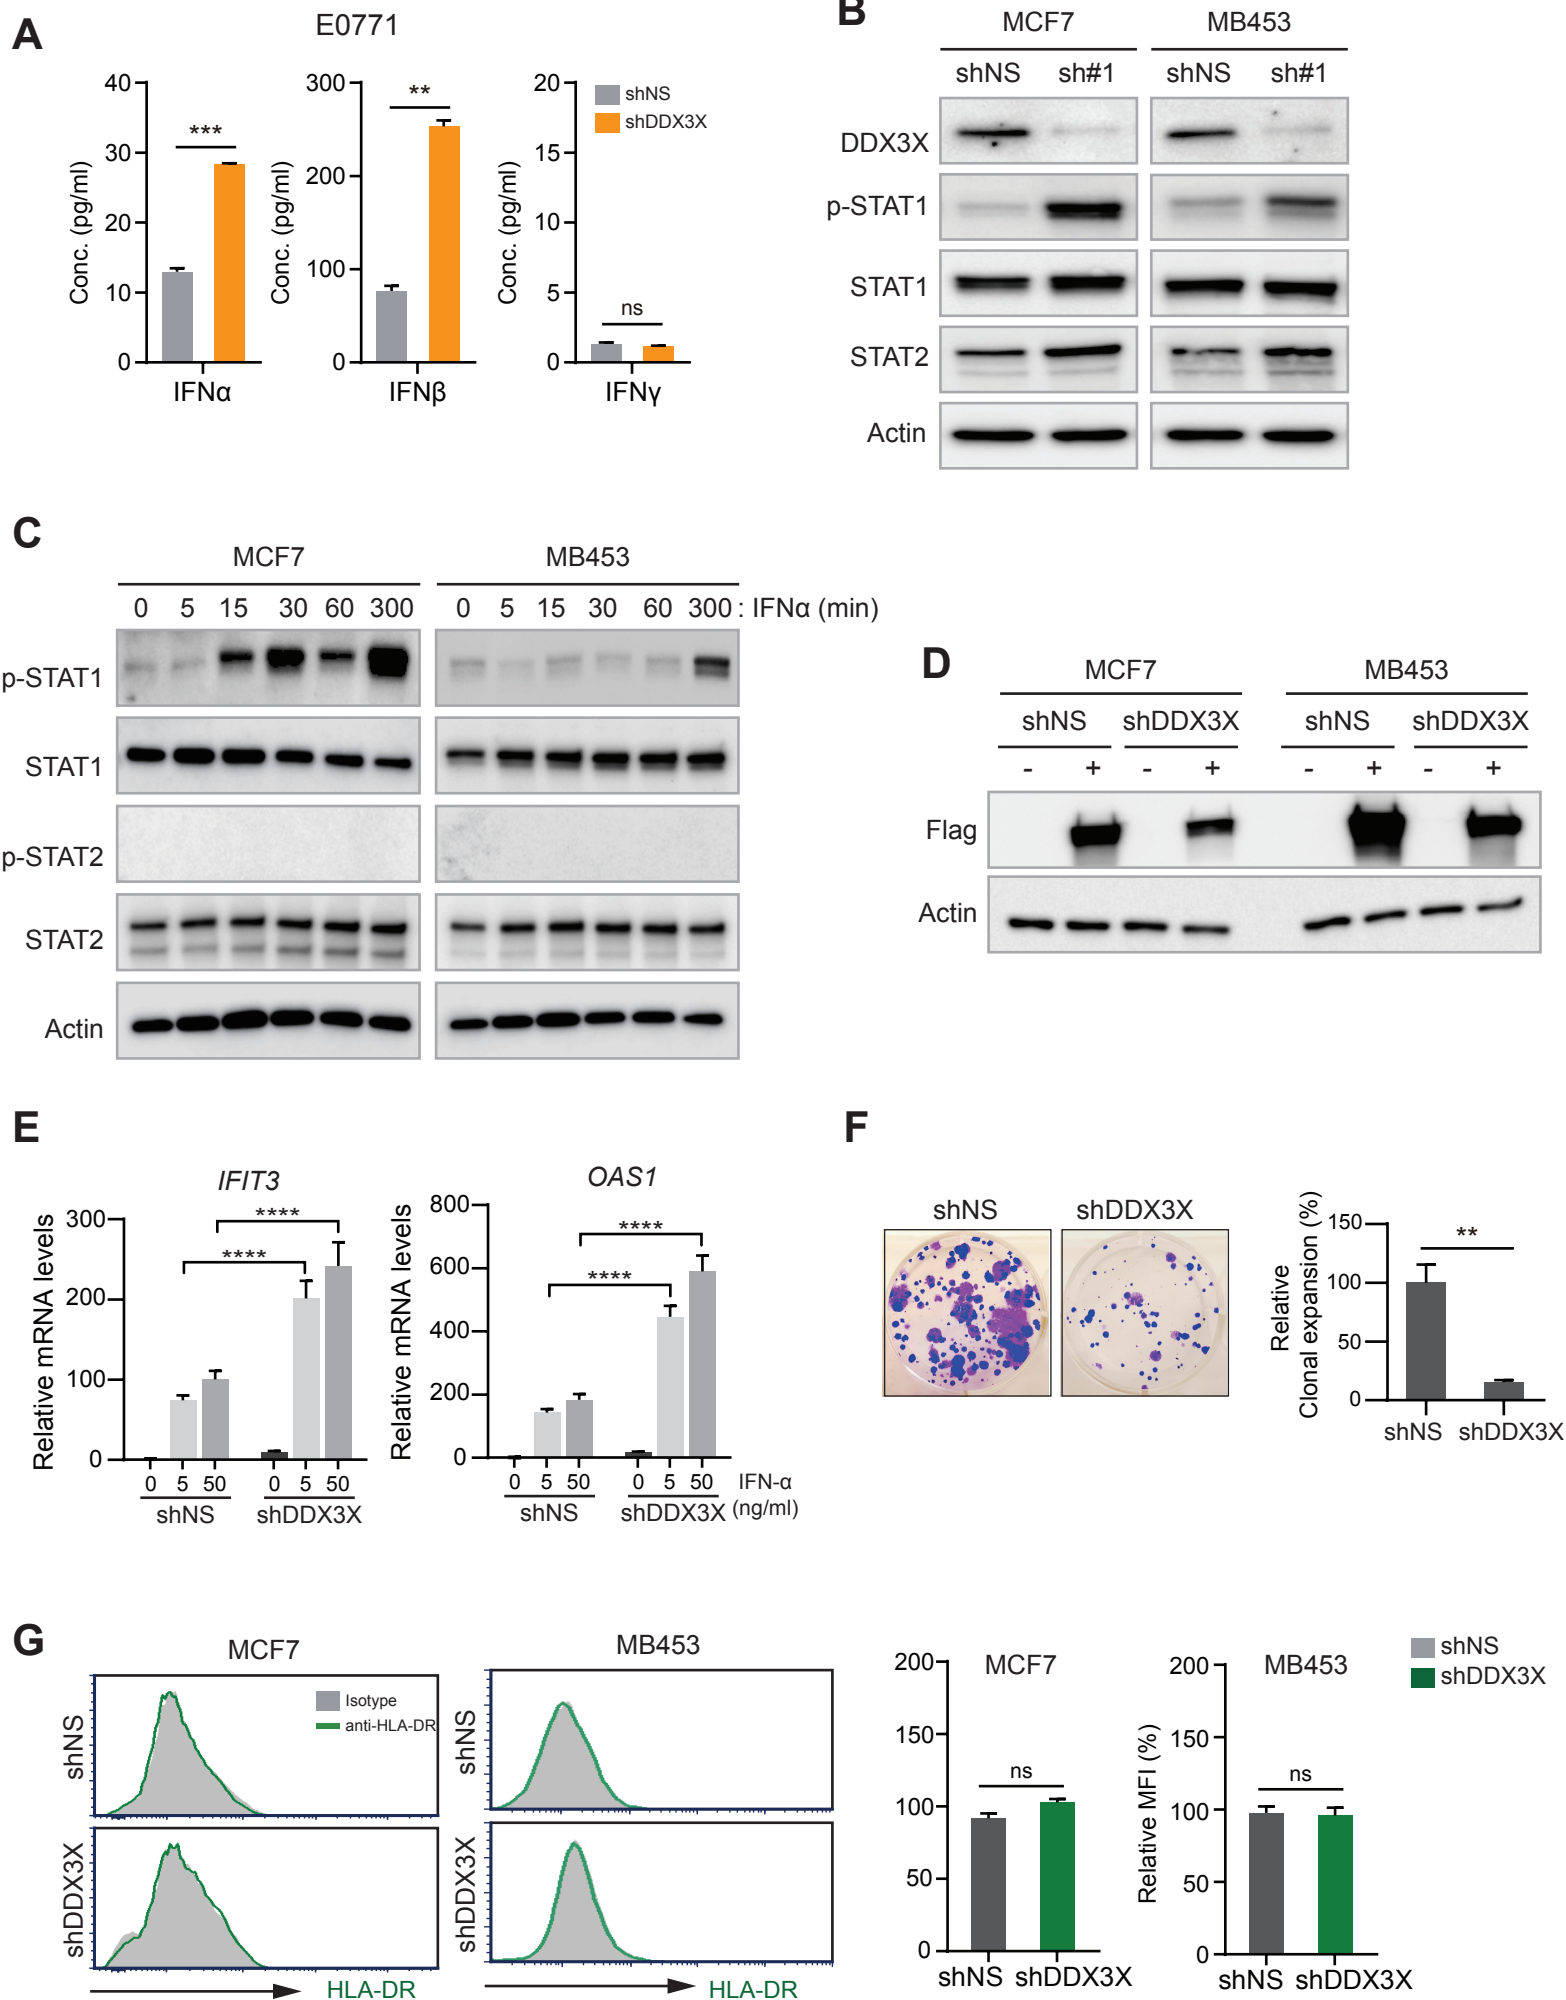

**Supplementary Figure 3. Loss of DDX3X induces type I IFN production, STAT1 activation, and antigen processing and presentation.**

- A.** ELISA of IFN- $\alpha$ , - $\beta$ , and - $\gamma$  in the culture supernatants from DDX3X-control or -KD E0771 cells.
- B.** Western blot analysis of phospho-STAT1, STAT1, and STAT2 in the DDX3X-control or -KD MCF7 cells using shDDX3X\_#1.
- C.** Western blot analysis of phospho-STAT1, STAT1, phospho-STAT2, and STAT2 in MCF7 or MDA-MB-453 cells with 5 ng/ml of IFN- $\alpha$  treatment.
- D.** Western blot validation of DDX3X overexpression by transfecting flag-tagged DDX3X overexpression vector.
- E.** qRT-PCR of *IFIT3* and *OAS1* in DDX3X-control or -KD MCF7 cells after IFN- $\alpha$  treatment for 5 hours.
- F.** Colony formation assay in DDX3X-control or -KD MCF7 cells (left). Intensity of crystal violet stained was measured by Image J (right).
- G.** Representative flow histograms and a bar graph of MHC class II (HLA-DR) in the DDX3X-KD MCF7 or DDX3X-KD MDA-MB-453 cells.

Data are shown as mean  $\pm$  SEM of three independent experiments. Statistical significance was calculated using unpaired t-tests. \*\* $p$  < 0.01; \*\*\* $p$  < 0.001; \*\*\*\* $p$  < 0.0001; ns, not significant.

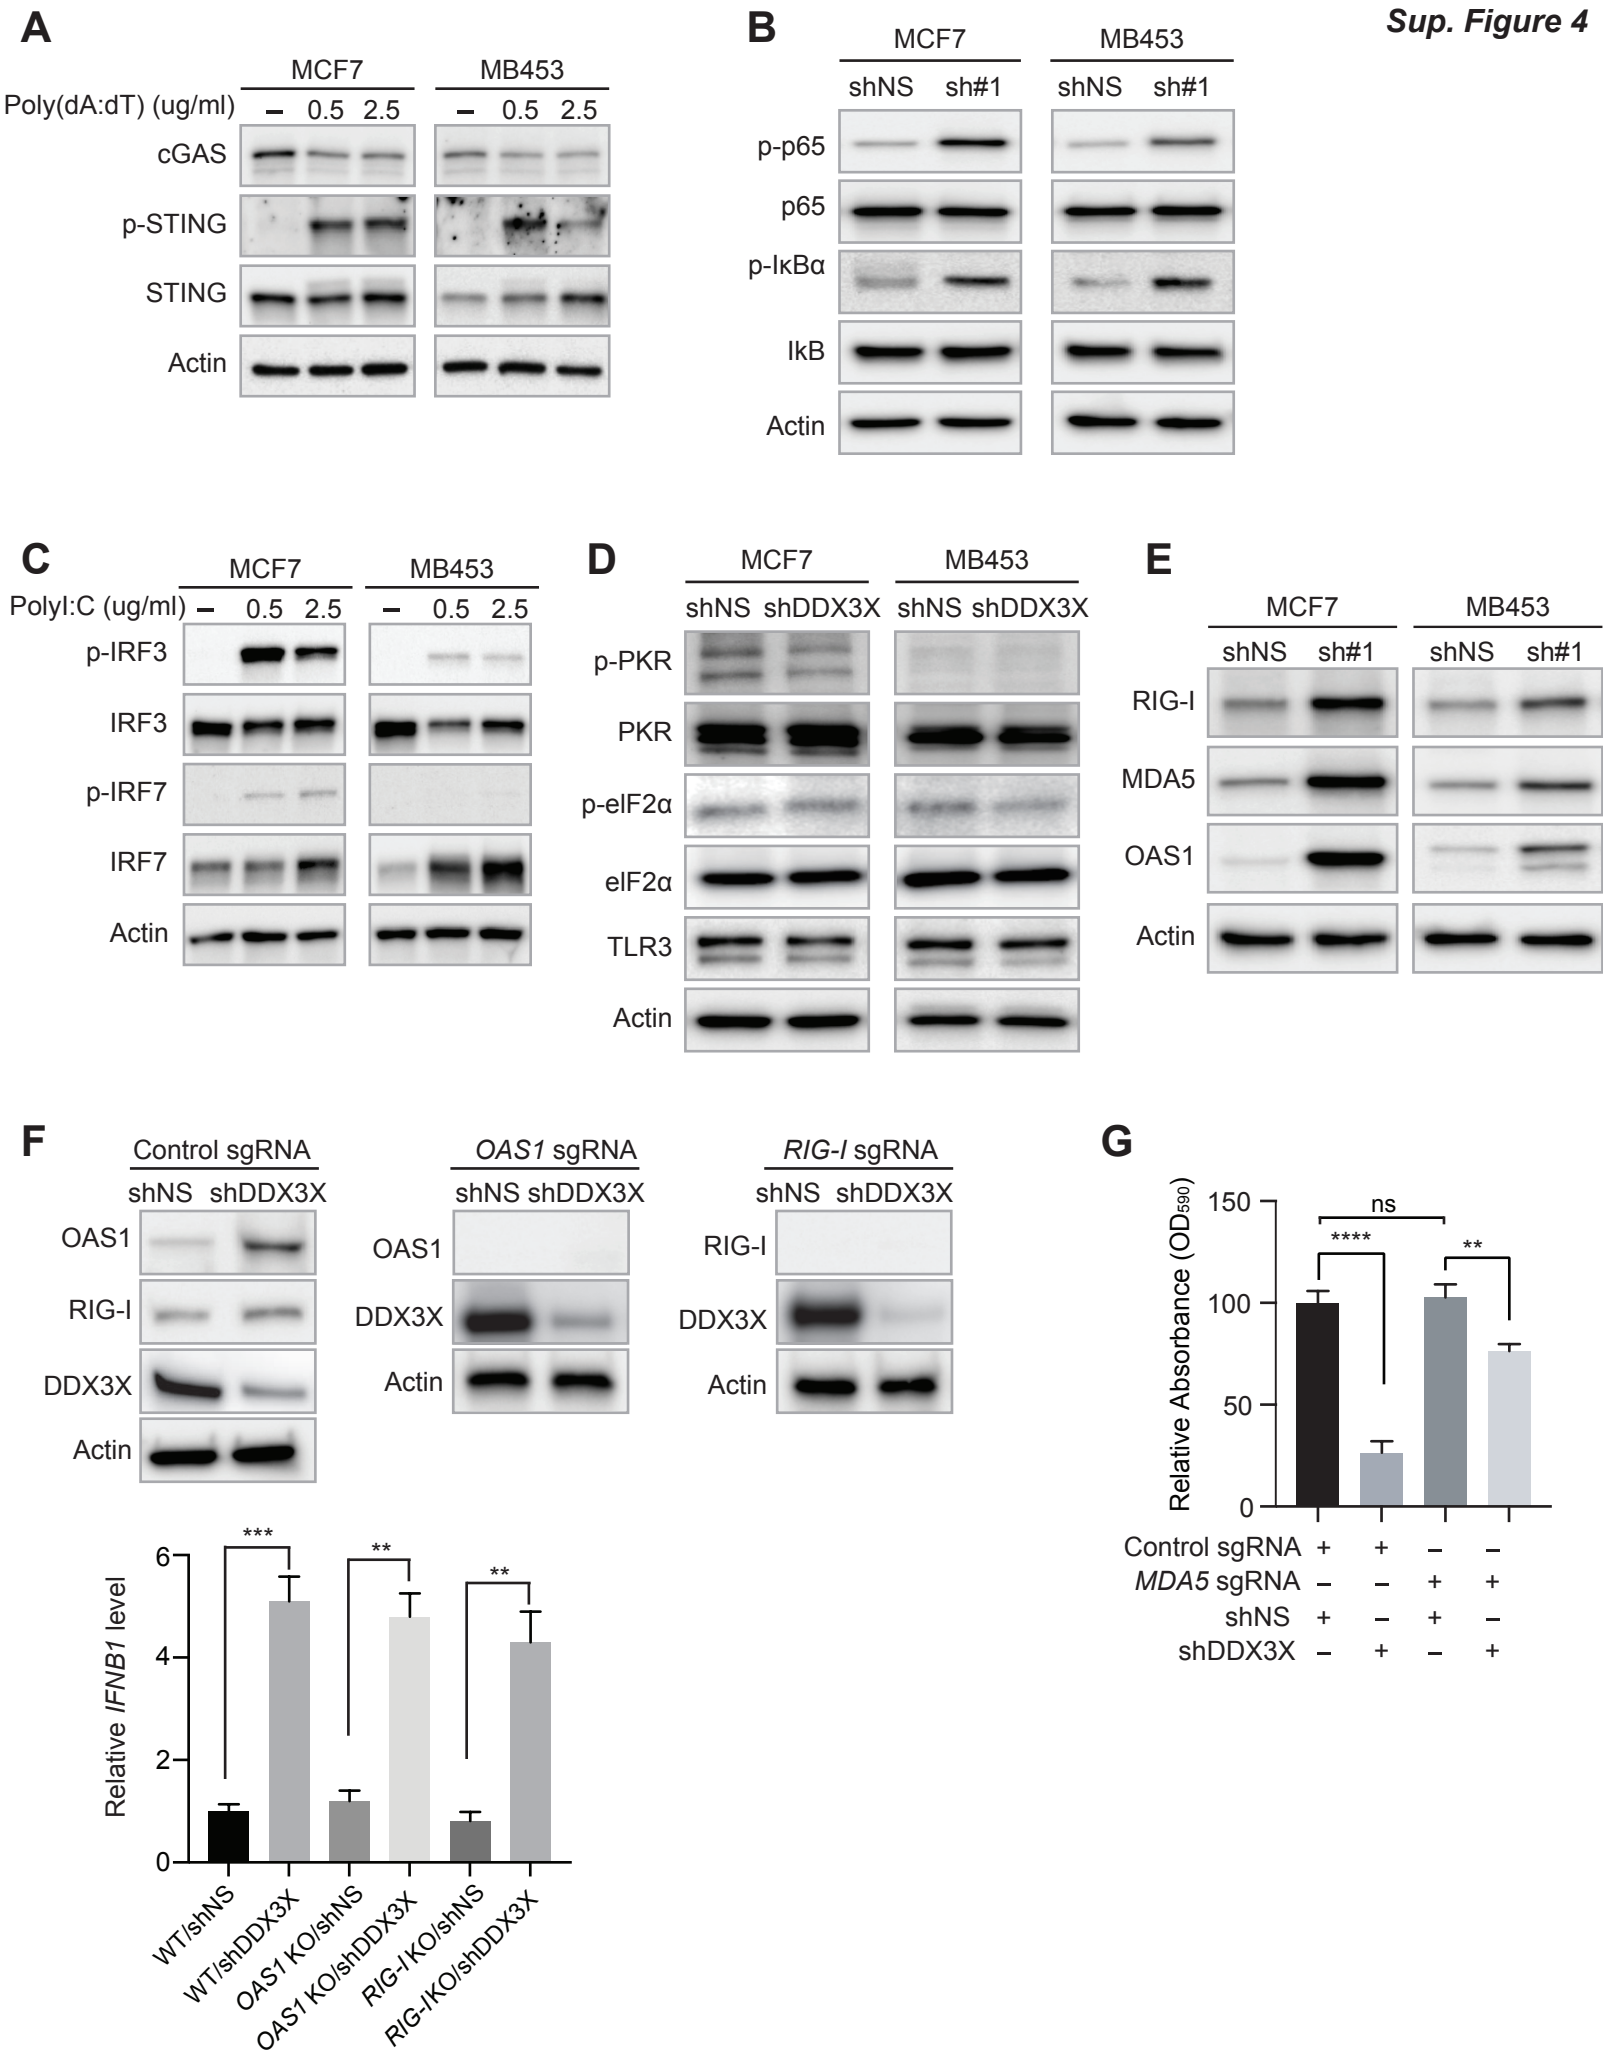

**Supplementary Figure 4. dsRNA sensing MDA5-NF $\kappa$ B signaling axis leads to type I IFN production in DDX3X-KD breast cancer cells.**

- A.** Western blot analysis of STING, phosphorylation of STING, and cGAS in MCF7 and MDA-MB-453 cells treated with poly(dA:dT) for 24 hours.
- B.** Western blot analysis of phosphorylation of NF $\kappa$ B p65 and I $\kappa$ B $\alpha$  in DDX3X-control or -KD MCF7 or MDA-MB-453 cells.
- C.** Western blot analysis of phosphorylation of TBK1, IRF3, and IRF7 in MCF7 and MDA-MB-453 cells treated with poly I:C for 24 hours.
- D.** Western blot analysis of phospho-PKR, PKR, phospho-eIF2 $\alpha$ , eIF2 $\alpha$ , and TLR3 in DDX3X-control or -KD MCF7 or MDA-MB-453 cells.
- E.** Western blot analysis of RIG-I, OAS1, and MDA5 in DDX3X-control or -KD MCF7 or MDA-MB-453 cells.
- F.** Western blot validation of CRISPR/Cas9-mediated *OAS1* or *RIG-I* knockout (KO). qRT-PCR of *IFNB1* in *OAS1* or *RIG-I* -wildtype (WT) or -KO MCF7 cells followed by DDX3X-control or -KD.
- G.** Colony formation of *MDA5* -WT or -KO MCF7 cells 7 days after DDX3X KD. Crystal violet absorbance (OD 590) of attached cells was quantified, and *MDA5* WT/shNS groups were normalized to 100%.

Data are shown as mean  $\pm$  SEM of three independent experiments. Statistical significance was calculated using unpaired t-tests. \* $p$  < 0.05; \*\* $p$  < 0.01; \*\*\* $p$  < 0.001; \*\*\*\* $p$  < 0.0001; ns, not significant.

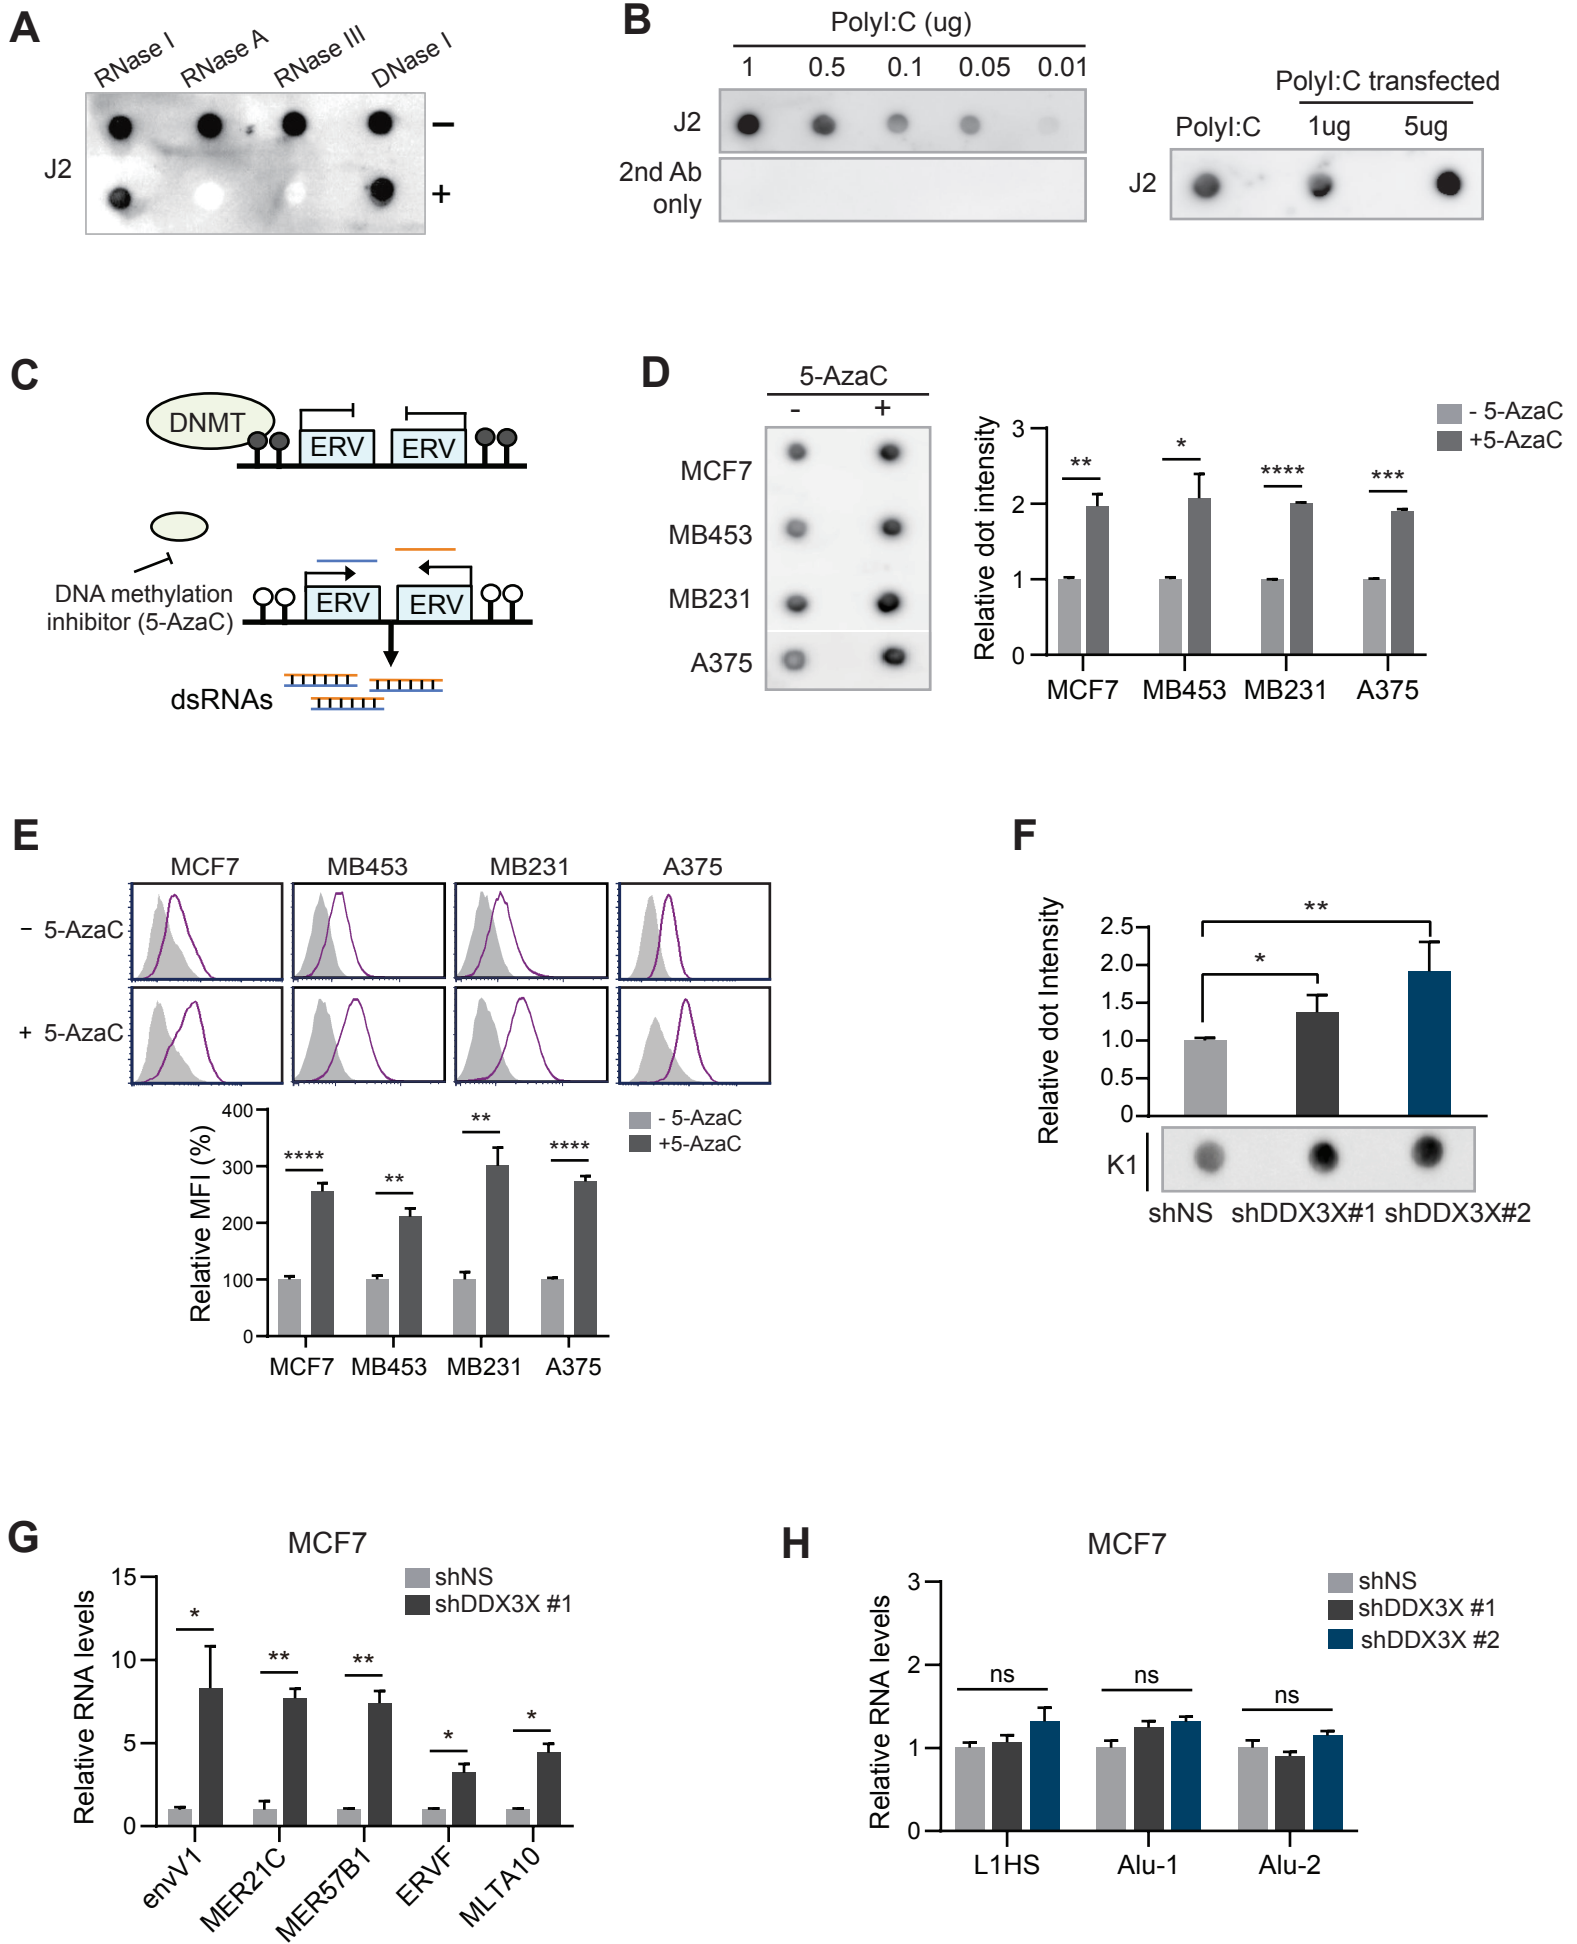



**Supplementary Figure 5. Knockdown of DDX3X triggers the cytoplasmic accumulation of endogenous dsRNAs.**

- A.** Dot blot analysis using J2 antibody in RNA extracted from MCF7 cells treated with RNases and DNase.
- B.** Dot blot analysis with poly I:C (left) or RNA extracts from poly I:C transfected cells (right).
- C.** Schema of DNA methyltransferase inhibitor (5-AzaC) action on dsRNA formation of ERVs.
- D. and E.** Increased endogenous dsRNA levels were analyzed by dot blot (D) and flow cytometry (E) after 5-AzaC treatment in each cell. Bar graphs represent relative dot intensity (D) and relative MFI (E).
- F.** Dot blot analysis using K1 antibody with total RNAs extracted from DDX3X-control or -KD MCF7 cells. Graph shows relative dot intensity.
- G.** qRT-PCR of ERV genes in DDX3X-control or -KD MCF7 cells.
- H.** qRT-PCR of L1HS and Alu in DDX3X-control or -KD MCF7 cells.

Data are shown as mean  $\pm$  SEM of three independent experiments. Statistical significance was calculated using unpaired t-tests. \* $p < 0.05$ ; \*\* $p < 0.01$ ; \*\*\* $p < 0.001$ ; \*\*\*\* $p < 0.0001$ ; ns, not significant.

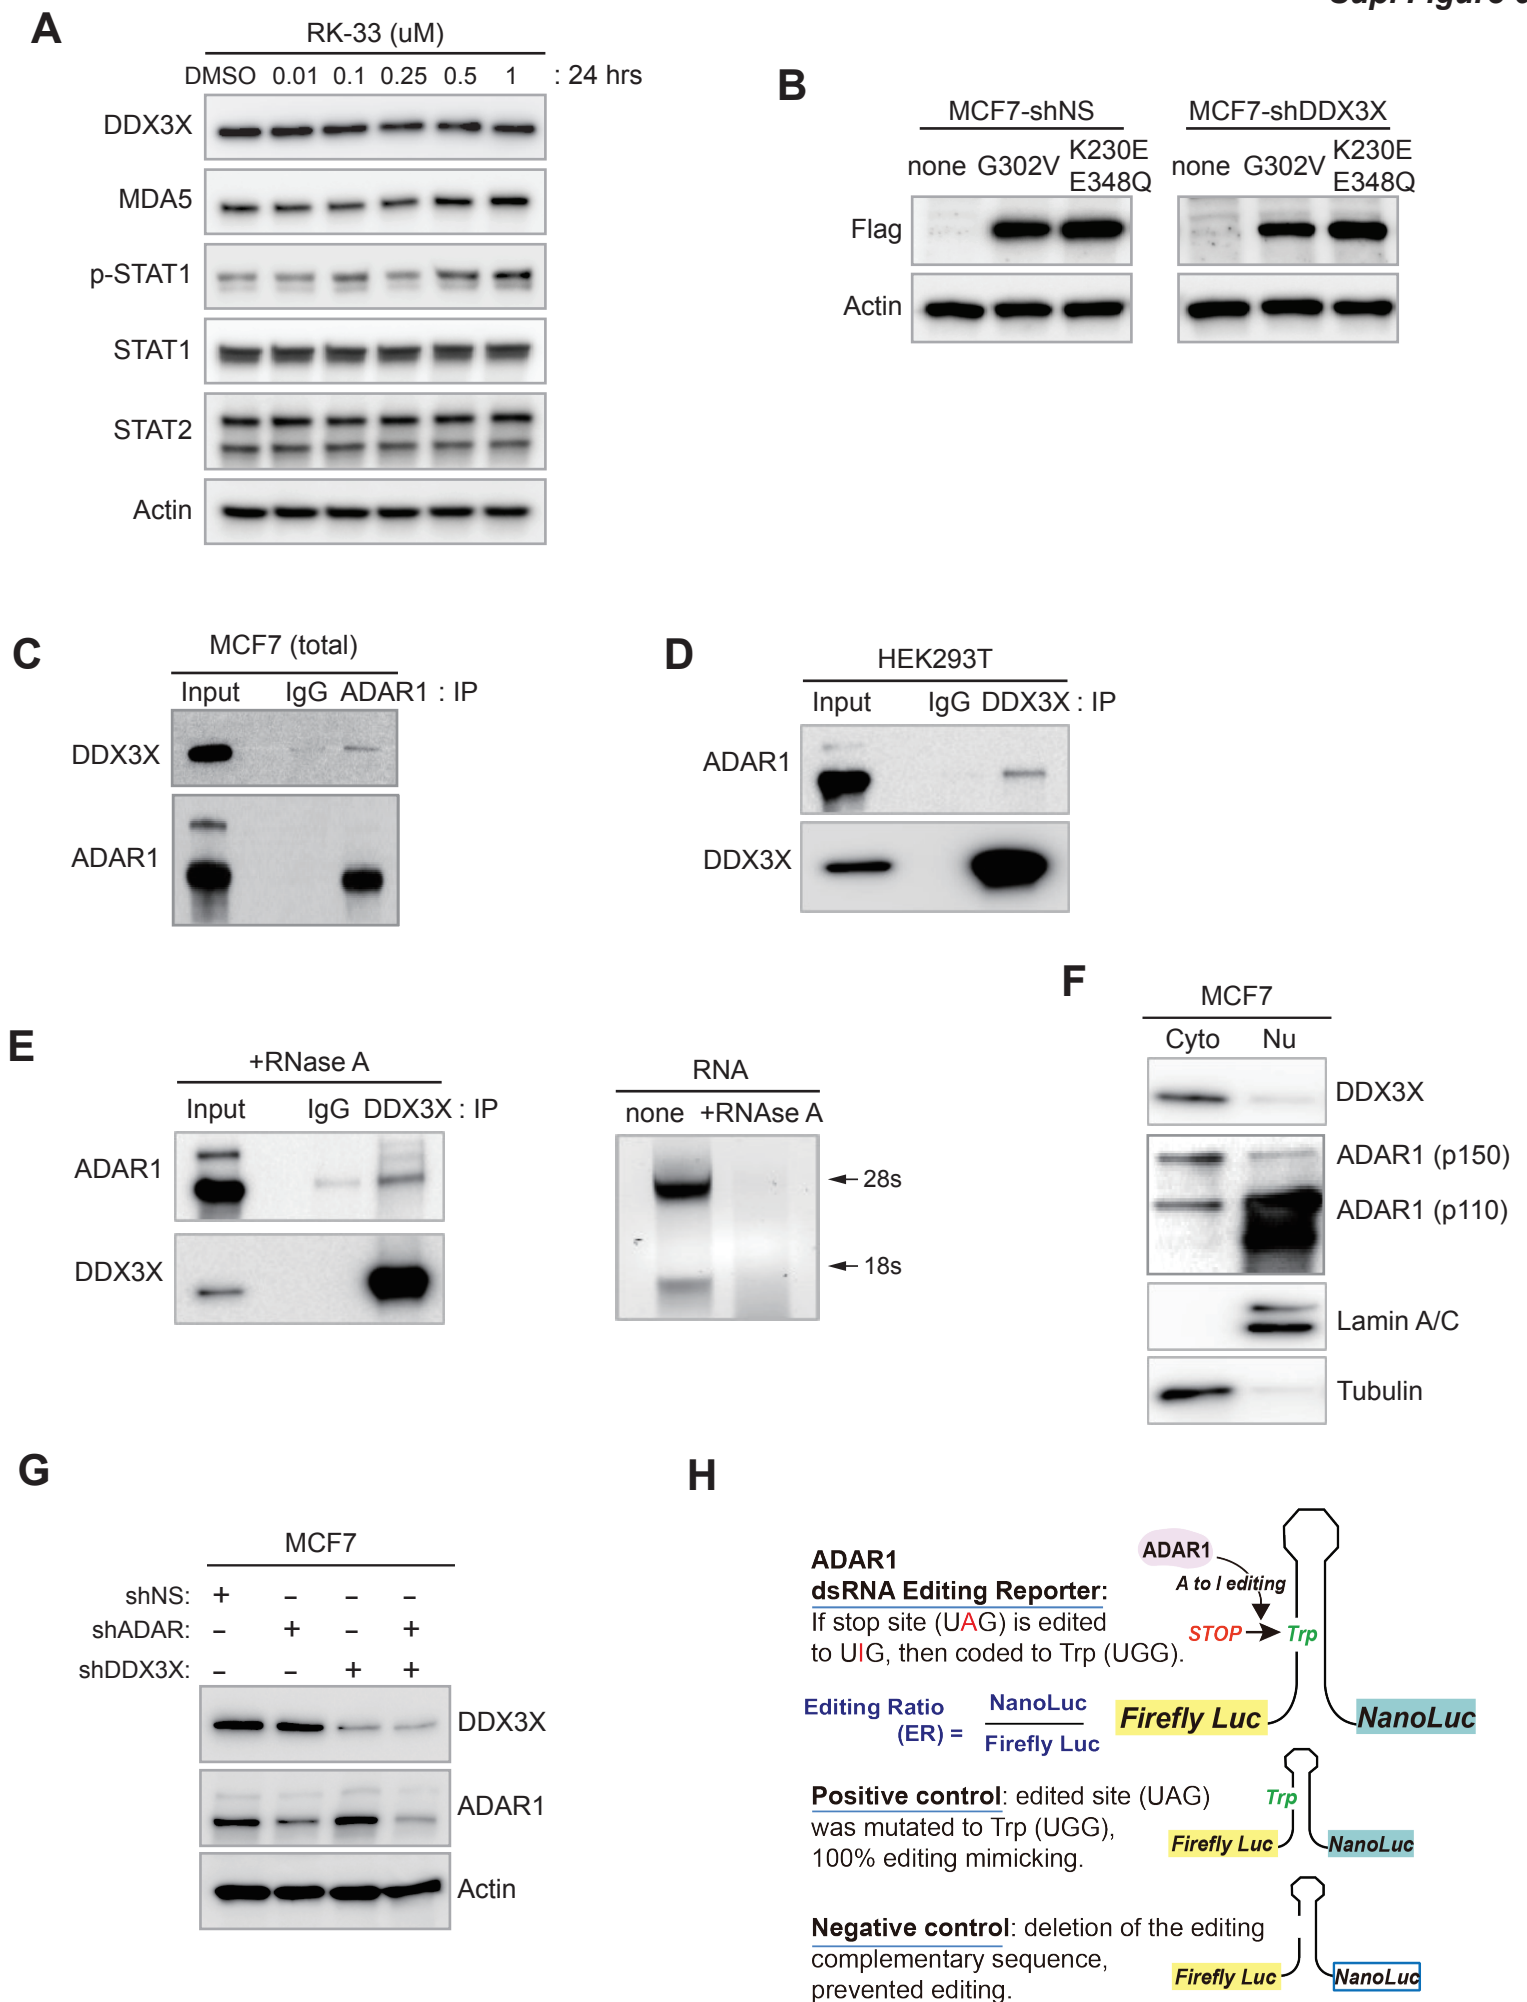

**Supplementary Figure 6. DDX3X helicase activity is critical for regulating dsRNAs and DDX3X is associated with ADAR1-mediated A-to-I dsRNA editing.**

- A.** Western blot analysis of phospho-STAT1, STAT1, STAT2, and MDA5 in RK-33 treated MCF7 cells for 24 hours.
- B.** Western blot analysis of overexpression of DDX3X mutants (G302V and K230E/E348Q).
- C.** Interaction between DDX3X and ADAR1 in MCF7 cells. IP was performed with ADAR1 antibody or control IgG.
- D.** Interaction between DDX3X and ADAR1 in HEK293T cells. IP was performed with DDX3X antibody or control IgG.
- E.** IP was performed with DDX3X antibody or control IgG and treated with RNase A (left). RNase A activity was confirmed by running RNA on the agarose gel (right).
- F.** Western blot of ADAR1 and DDX3X in cytoplasmic and nuclear fraction of MCF7 cells (Lamin A/C: nuclear marker, Tubulin: cytoplasmic marker).
- G.** Western blot validation of single or double knockdown of DDX3X and ADAR1 in MCF7 cells.
- H.** Schema of A-to I editing assay using dual luciferase assay system with positive and negative control vectors.

Data are representative of three independent experiments.

**A**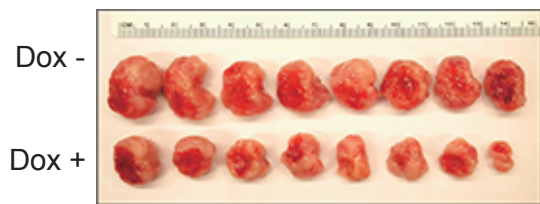**B**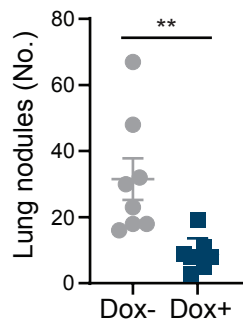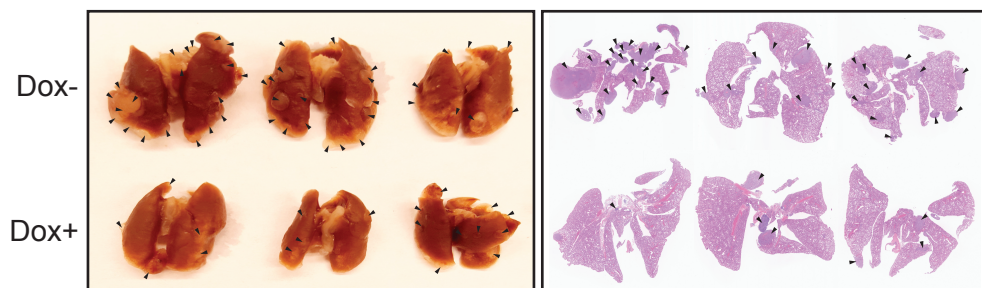**C**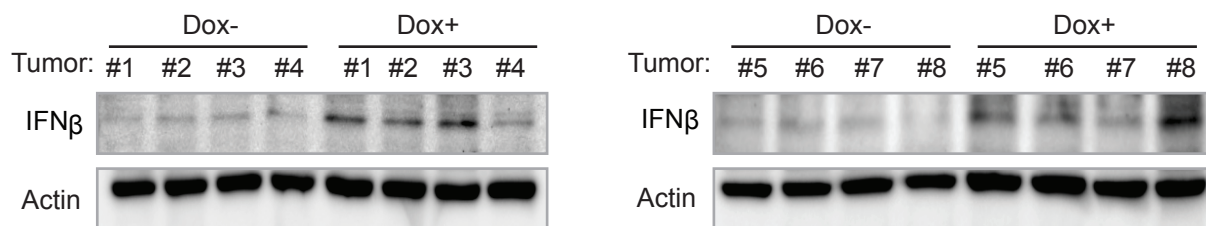**D**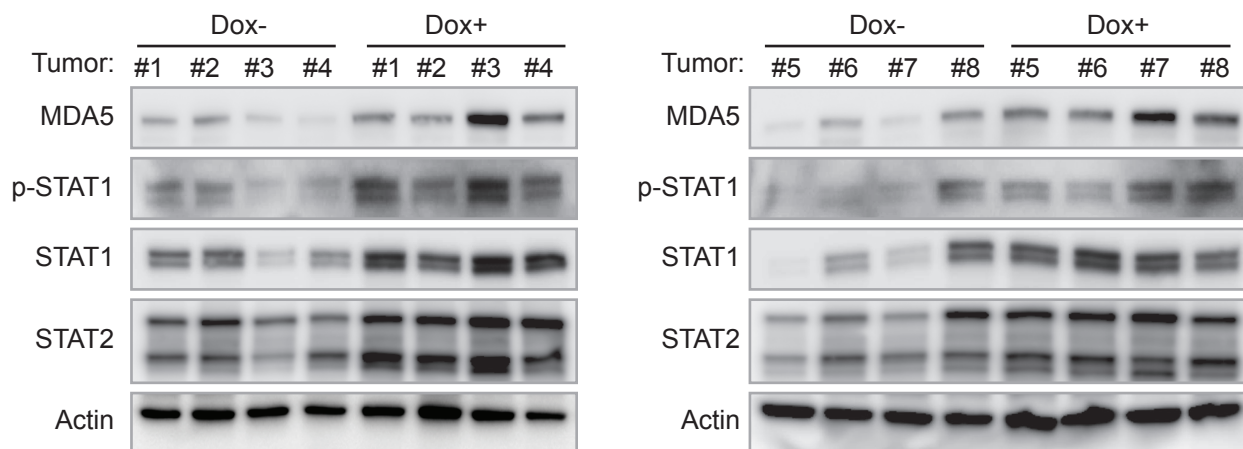

**Supplementary Figure 7. Loss of DDX3X augments dsRNA sensing and IFN signaling in a syngeneic breast cancer model.**

- A.** Images of tumors isolated from mice bearing 4T1 breast tumor with DDX3X-control (Dox-) or -inducible KD (Dox+).
  - B.** Number of metastatic tumor nodules in lung (left) and representative lung images (right) of mice bearing DDX3X-control or -inducible KD 4T1 tumors.
  - C.** Western blot of IFN- $\beta$  in DDX3X-control (Dox-) or -inducible KD (Dox+) 4T1 tumors.
  - D.** Western blot analysis of MDA5, phospho-STAT1, STAT1, and STAT2 in DDX3X-control (Dox-) or -inducible KD (Dox+) 4T1 tumors.
- Data are represented as mean  $\pm$  SEM. Unpaired t-tests. **\*\*** $P < 0.01$ .

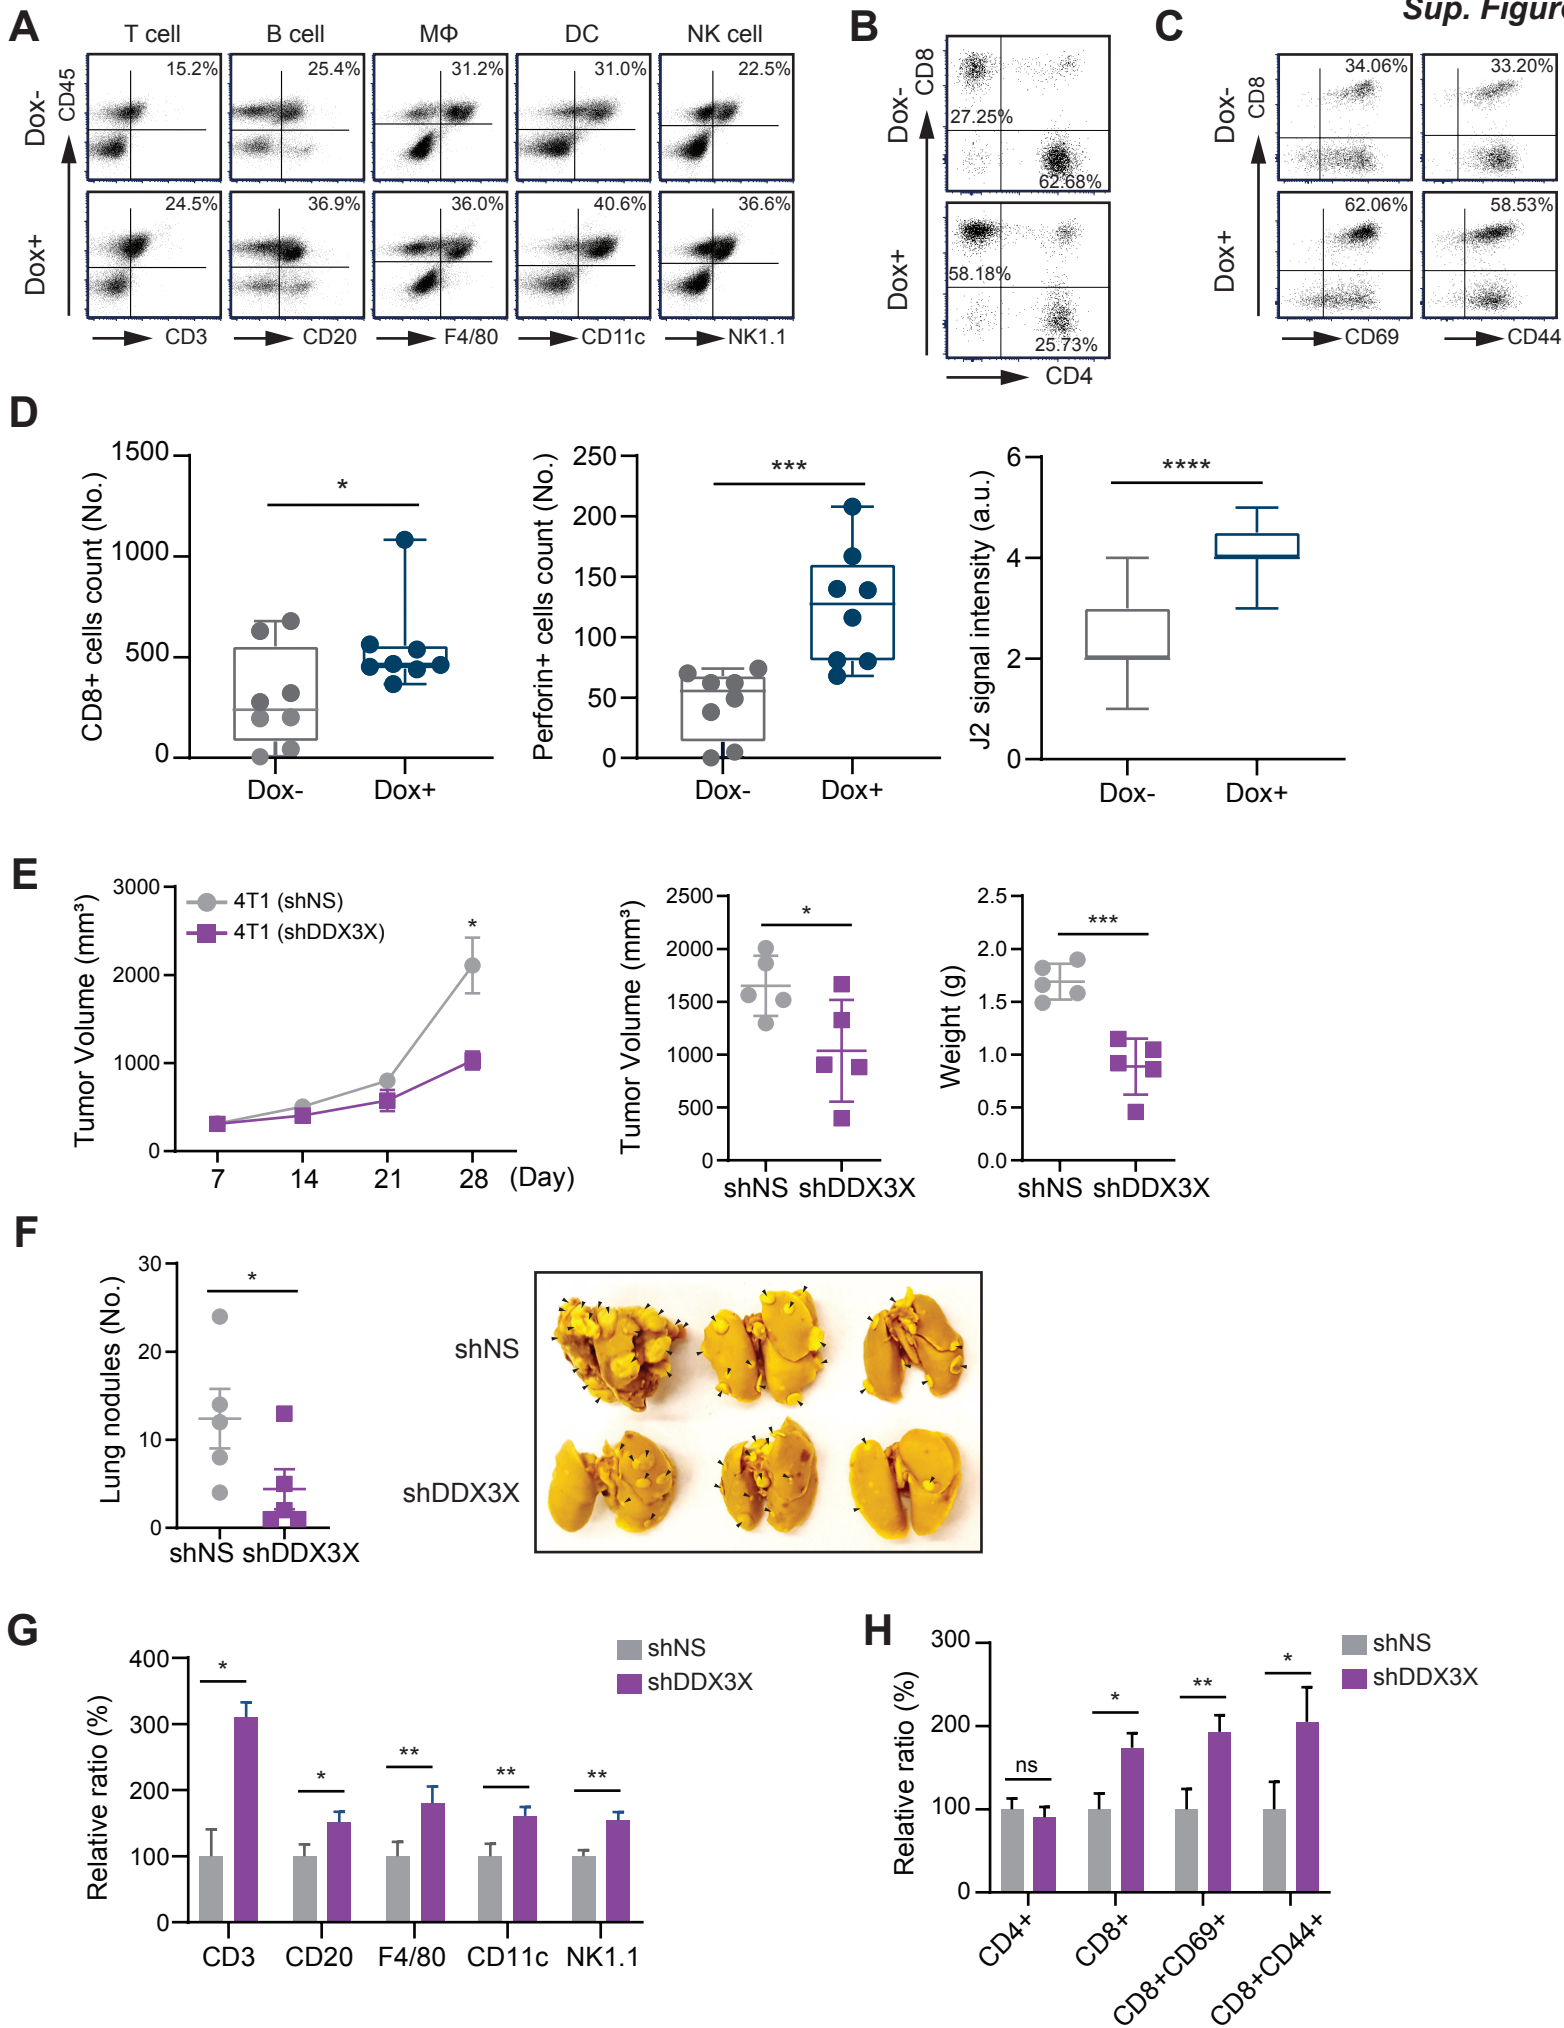

**Supplementary Figure 8. DDX3X-depleted tumor innate immunity is primed by dsRNA-stimulated tumor-intrinsic type I IFN.**

- A.** Representative dot plots showing each cell marker expression of CD45+ cells isolated from DDX3X-control (Dox-) or -inducible KD (Dox+) 4T1 tumors. CD3+; T cell, CD20+; B cell, F4/80+; Macrophage, CD11c; dendritic cell, NK1.1; NK cell.
- B.** Representative dot plots showing CD4+ or CD8+ T cells isolated from DDX3X-control (Dox-) or -inducible KD (Dox+) 4T1 tumors.
- C.** Representative dot plots showing CD8+, CD69+, and CD44+ T cells isolated from DDX3X-control (Dox-) or -inducible KD (Dox+) 4T1 tumors.
- D.** Quantification of CD8, perforin positive cells, and J2 signal in IHC of Figure 7J.
- E.** Tumor growth (mm<sup>3</sup>), volume (mm<sup>3</sup>), and weight (g) in BALB/c mice bearing DDX3X-control or -stable KD 4T1 cells (5 mice/group).
- F.** Lung metastasis of DDX3X-control or -stable KD 4T1 tumors.
- G.** Quantification of each cell type after flow cytometric analysis of DDX3X-control or -stable KD 4T1 tumors. CD3+; T cell, CD20+; B cell, F4/80+; Macrophage, CD11c; dendritic cell, NK1.1; NK cell.
- H.** Quantification of each type of T cell after flow cytometric analysis of DDX3X-control or -stable KD 4T1 tumors.

Data are represented as mean  $\pm$  SEM. Unpaired t-tests. \* $P < 0.05$ ; \*\* $P < 0.01$ ; \*\*\* $P < 0.001$ ; \*\*\*\* $P < 0.0001$ ; ns, not significant.

**Table S1. Primer list for qRT-PCR**

| Primer              | Sequence (5'-3')         |
|---------------------|--------------------------|
| envV1 forward       | GTGGCTCCATAACTTTGGAAAA   |
| envV1 reverse       | TAAGTGCAGCTGGTCCCAGTA    |
| MER21C forward      | GGAGCTTCCTGATTGGCAGA     |
| MER21C reverse      | ATGTAGGGTGGCAAGCACTG     |
| MER57B1 forward     | CCTCCTGAGCCAGAGTAGGT     |
| MER57B1 reverse     | ACCAGTCTGGCTGTTTCTGT     |
| ERV-F(XA34) forward | CAGGAAACTAACTTTTCAGCCAGA |
| ERV-F(XA34) reverse | TAAAGAGGGCATGGAGTAATTGA  |
| ERV9-1 forward      | TCTTGGAGTCCTCACTCAAACCTC |
| ERV9-1 reverse      | ACTGCTGCAACTACCCTTAAACA  |
| MLTA10 forward      | TCTCACAATCCTGGAGGCTG     |
| MLTA10 reverse      | GACCAAGAAGCAAGCCCTCA     |
| Alu-1 forward       | GTCAGGAGATCGAGACCATCCT   |
| Alu-1 reverse       | AGTGGCGCAATCTCGGC        |
| Alu-2 forward       | GAGGCTGAGGCAGGAGAATCG    |
| Alu-2 reverse       | GTGCCCCAGGCTGGAGTG       |
| L1HS forward        | AAAGCCGCTCAACTACATGG     |
| L1HS reverse        | TGCTTTGAATGCGTCCCAGAG    |

**TaqMan Gene Expression Assay**

| Primer        | Assay ID      |
|---------------|---------------|
| DDX3X         | Hs00606179_m1 |
| IFI44L        | Hs00915292_m1 |
| IFI44L        | Mm00518988_m1 |
| IFIT2         | Hs01922738_s1 |
| IFIT2         | Mm00492606_m1 |
| IFIT3         | Hs00155468_m1 |
| ISG15         | Hs00192713_m1 |
| STAT1         | Hs01013996_m1 |
| STAT1         | Mm00439531_m1 |
| STAT2         | Mm00490880_m1 |
| OAS1          | Hs00973635_m1 |
| OAS2          | Hs00942643_m1 |
| OAS2          | Mm00460961_m1 |
| MX1           | Hs00895608_m1 |
| TAP1          | Hs00388675_m1 |
| TAP2          | Hs00241060_m1 |
| PSMB8         | Hs00188149_m1 |
| HLA-A         | Hs01058806_g1 |
| HLA-B         | Hs00818803_g1 |
| HLA-C         | Hs03044135_m1 |
| HLA-DRA       | Hs00219575_m1 |
| DDX58 (RIG-I) | Hs01061436_m1 |
| IFIH1 (MDA5)  | Hs00223420_m1 |
| IFIH1 (MDA5)  | Mm00459183_m1 |
| CCL5          | Hs00982282_m1 |
| IFNB1         | Hs01077958_s1 |
| IFNB1         | Mm00439552_s1 |
| 18S           | Hs99999901_s1 |

**Primers for TASA-TD PCR**

| Primer                   | Sequence (5'-3')                                     |
|--------------------------|------------------------------------------------------|
| TAG-primer               | GCACACGACGACAGACGACGCAC                              |
| Actb sense               | GCTCGTCGTCGACAACGGCTCCGGCA                           |
| Actb antisense           | CAAACATGATCTGGGTCATCTTCTC                            |
| Actb sense-tag           | GCACACGACGACAGACGACGCACCAACATGATCTGGGTCATCTTCTC      |
| Actb antisense-tag       | GCACACGACGACAGACGACGCACGCTCGTCGTCGACAACGGCTCCGGCA    |
| Syncytin-1 sense         | ATGGAGCCCAAGATGCAG                                   |
| Syncytin-1 antisense     | CTAACTGCTTCTGCTGAATTGGGGCGTAG                        |
| Syncytin-1 sense-tag     | GCACACGACGACAGACGACGCACCTAACTGCTTCTGCTGAATTGGGGCGTAG |
| Syncytin-1 antisense-tag | GCACACGACGACAGACGACGCACATGGAGCCCAAGATGCAG            |
| ERV9-1 sense             | CTCTGGGGTCTGACAACAT                                  |
| ERV9-1 antisense         | CCAGGTAGTCCCCACTACGA                                 |
| ERV9-1 sense-tag         | GCACACGACGACAGACGACGCACCCAGGTAGTCCCCACTACGA          |
| ERV9-1 antisense-tag     | GCACACGACGACAGACGACGCACCTCTGGGGTCTGACAACAT           |



**Table S2. Antibody Information**

| <i>Western blot</i>                        |                           |                       |
|--------------------------------------------|---------------------------|-----------------------|
| <b>Antibodies</b>                          | <b>Company</b>            | <b>Catalog number</b> |
| rabbit anti-DDX3                           | Bethyl Laboratories       | A300-474A             |
| mouse anti-DDX3                            | Santa Cruz                | sc-365768             |
| rabbit anti-DDX1                           | Bethyl Laboratories       | A300-521A             |
| rabbit anti-DDX5                           | Bethyl Laboratories       | A300-523A             |
| rabbit anti-ADAR1                          | Bethyl Laboratories       | A303-884A             |
| rabbit anti-phospho-Stat1 (Tyr701)         | Cell Signaling Technology | #9167                 |
| rabbit anti-Stat1                          | Cell Signaling Technology | #14994                |
| rabbit anti-phospho-Stat2 (Tyr690)         | Cell Signaling Technology | #4441                 |
| rabbit anti-Stat2                          | Cell Signaling Technology | #72604                |
| rabbit anti-RIG-I                          | Cell Signaling Technology | #4200                 |
| rabbit anti-MDA-5                          | Cell Signaling Technology | #5321                 |
| rabbit anti-OAS1                           | Cell Signaling Technology | #14498                |
| rabbit anti-Toll-like Receptor 3           | Cell Signaling Technology | #6961                 |
| rabbit anti-phospho-PKR (Thr451)           | Millipore                 | #07-886               |
| mouse anti PKR                             | Santa Cruz                | sc-6282               |
| rabbit anti-phospho-eIF2 $\alpha$ (Ser51)  | Cell Signaling Technology | #9721                 |
| rabbit anti-eIF2 $\alpha$                  | Cell Signaling Technology | #9722                 |
| rabbit anti-cGAS                           | Cell Signaling Technology | #15102                |
| rabbit anti-phospho-STING (Ser366)         | Cell Signaling Technology | #85735                |
| rabbit anti-STING                          | Cell Signaling Technology | #13647                |
| rabbit anti-phospho-TBK1/NAK (Ser172)      | Cell Signaling Technology | #5483                 |
| rabbit anti-TBK1/NAK                       | Cell Signaling Technology | #3504                 |
| rabbit anti-phospho-NF-kB p65 (Ser536)     | Cell Signaling Technology | #3033                 |
| rabbit anti-NF-kB p65                      | Cell Signaling Technology | #8242                 |
| rabbit anti-phospho-IkBa (Ser32)           | Cell Signaling Technology | #2859                 |
| mouse anti-IkBa                            | Cell Signaling Technology | #4814                 |
| rabbit anti-phospho-IRF-3 (Ser396)         | Cell Signaling Technology | #29047                |
| rabbit anti-IRF-3                          | Cell Signaling Technology | #11904                |
| rabbit anti-phospho-IRF-7 (Ser477)         | Cell Signaling Technology | #12390                |
| rabbit anti-IRF-7                          | Cell Signaling Technology | #13014                |
| rabbit anti-IFN- $\beta$ 1 (MouseSpecific) | Cell Signaling Technology | #97450                |
| mouse anti-Lamin A/C                       | Santa Cruz                | sc-376248             |
| mouse anti- $\alpha$ -tubulin              | Abcam                     | ab7291                |
| mouse anti-FLAG M2                         | Sigma                     | F1804                 |
| mouse anti- $\beta$ -Actin                 | Santa Cruz                | sc-4777               |

  

| <i>Flow cytometry</i>                                 |                |                       |
|-------------------------------------------------------|----------------|-----------------------|
| <b>Antibodies</b>                                     | <b>Company</b> | <b>Catalog number</b> |
| Brilliant Violet 510 anti-mouse CD45 Antibody         | BioLegend      | 103138                |
| Brilliant Violet 605 anti-mouse CD3 Antibody          | BioLegend      | 100237                |
| PE/Cy7 anti-mouse CD20 Antibody                       | BioLegend      | 150420                |
| PE/Dazzle 594 anti-mouse F4/80 Antibody               | BioLegend      | 123146                |
| Brilliant Violet 785 anti-mouse CD11c Antibody        | BioLegend      | 117336                |
| Brilliant Violet 711 anti-mouse NK-1.1 Antibody       | BioLegend      | 108745                |
| PE/Dazzle 594 anti-mouse CD4 Antibody                 | BioLegend      | 100456                |
| Brilliant Violet 421 anti-mouse CD8 $\alpha$ Antibody | BioLegend      | 100738                |
| Brilliant Violet 785 anti-mouse CD69 Antibody         | BioLegend      | 104543                |
| PE/Cy7 anti-mouse CD44 Antibody                       | BioLegend      | 103030                |
| APC conjugated anti-mouse H-2Kb bound to SIINFEKL     | BioLegend      | 141605                |
| APC conjugated anti-human HLA-ABC                     | BD Pharmingen  | 562006                |
| APC conjugated anti-human HLA-DR                      | BioLegend      | 307609                |
| J2 anti-dsRNA antibody                                | Scicons        | 10010500              |
| APC conjugated mouse IgG2a isotype control            | BioLegend      | 400219                |
| APC conjugated mouse IgG1 Isotype control             | BD Pharmingen  | 555751                |

### **Table S3. List of DEGs identified by RNA deep sequencing analysis related to Fig.1B**

Differentially expressed genes (DEGs) and gene list from RNA deep sequencing in DDX3X-control and -knockdown MCF7 cells is available in the separate excel file. RNA sequencing data is available in GEO repository (accession number: GSE157323)

## **Supplementary Materials and Methods**

### **Cell culture and Generation of stable cell lines**

For generation of stable DDX3X knockdown cell lines, the following sequences were targeted:

GIPZ Lentiviral Human DDX3X shRNA #1\_Clone Id\_V2LHS\_228965: 5'-

TAAATCTGACTCAAGATGG-3', GIPZ Lentiviral Human DDX3X shRNA #2\_Clone

Id\_V3LHS\_301003: 5'-GTACTGCCAACTCTCTCGT-3', GIPZ negative (non-targeting or non-

silencing) shRNA control \_Catalog ID\_RHS4346, TRIPZ Inducible Lentiviral shRNA Human

DDX3X #1\_Clone Id\_V3THS\_301003: 5'-GTACTGCCAACTCTCTCGT-3', TRIPZ Inducible

Lentiviral shRNA Human DDX3X #2\_Clone Id\_V2THS\_228965: 5'-

TAAATCTGACTCAAGATGG-3', SMART vector Inducible Mouse Ddx3x PGK-TurboRFP

shRNA #1\_Clone Id\_V3SM11253-232377132: 5'-TCCCTCTTGAATCACCCCG-3',

SMARTvector Inducible Mouse Ddx3x PGK-TurboRFP shRNA #2\_Clone Id\_V3SM11253-

232987995: 5'-TGCACTGCCAATTCTCTCG-3'. Recombinant lentiviral particles were produced

using a protocol provided by the manufacturer (Addgene). In brief, 2 µg of shRNA-encoding

vector DNA, 1.5 µg of psPAX2 (packaging vector) and pMD2.G (VSVG envelope vector) vectors

were transfected into HEK293T cells in 94 mm<sup>2</sup> dish using the TransIT-LT1 Transfection

Reagent (Mirus). Supernatants containing virus particles were collected 72 hours post-

transfection. Filtered viral supernatants were added to the growth medium in the presence of

polybrene (8 µg/ml). To establish stable KD cell lines, cells were selected 48 hours after viral

infection using 2 µg/ml of puromycin and single colonies were isolated and propagated.

Knockdown efficiency was validated by western blotting (protein) and qRT-PCR (mRNA). The

IFIH1, DDX58, and OAS1 genes were deleted respectively according to the manufacturer's instructions using a MDA5 (IFIH1) Human Gene Knockout Kit (OriGene, KN415661), RIG-I (DDX58) Human Gene Knockout Kit (OriGene, KN41615), and OAS1 Human Gene Knockout Kit (OriGene, KN400696), respectively.

### **Next-generation RNA-Sequencing and Data analysis**

Total RNA was prepared from control and DDX3X knockdown MCF7 cells using TRIzol Reagent (15596026, Thermo Fisher) according to the manufacturer's protocol. RNA-seq libraries were prepared using the SOLiD Total RNA-Seq Kit (4452437, Applied Biosystem) and the library quality was checked using an Agilent 2100 Bioanalyzer. RNA sequencing was performed on an 5500XL SOLiD Sequencer (Applied Biosystem) according to the manufacturer's protocol. Reads were mapped to the human genome and genic read quantified using LifeScope Genomic Analysis Software and GRCh37 (hg19) genome and transcriptome annotations. Normalization, differential expression analysis, and principle component analysis were performed using R package DEseq2 version 1.45 (1). Heatmap was constructed using R package heatmap version 1.0.10. Differentially expressed genes (DEGs) were selected above FDR < 0.05 and fold change > 1.5. DEGs were used for input into Ingenuity Pathway Analysis (IPA). Gene Set Enrichment Analysis (GSEA) was performed using GSEA software with default setting and associated Molecular Signature Database (MSigDB) as previously described (2). GEO accession number: GSE157323

### **CCLE data analysis**

Gene expression and gene effect data were obtained from the CCLE and DeMap portal (<http://doi:10.6084/m9.figshare.11384241.v2>). Cell lines from fibroblast and hematopoietic lineage were excluded from the expression profile analysis. DDX3X high expressing (DDX3X<sup>hi</sup>) cells and DDX3X low expressing (DDX3X<sup>low</sup>) cells were selected by DDX3X expression level (top 25% and bottom 25%, respectively). RNA-seq data, from selected groups, was normalized

using the voom method and differential expression determined by limma (3). MHC core scores were calculated with mean absolute deviation modified Z-score mRNA expression data in CCLE. The score was defined as the mean Z-score of all MHC class genes in each group. GSEA analysis was performed using fgsea function (4).

### **TASA-TD strand-specific PCR**

Specific components from the SuperScriptIII First-Strand Synthesis System for RT-PCR (Life technologies) were used to perform reverse transcription with RNA from MCF7 cells. For the first strand cDNA synthesis reaction, 50 ng of RNA for  $\beta$ -actin, 400 ng for *Syncytin-1*, and 500  $\mu$ g for *Env9-1* were used. 1  $\mu$ M of a gene specific primer ligated to a TAG-sequence not specific for the human genome (GSP sense/antisense (RT) TAG) was implemented in the reaction. RNA and primers were preheated at 65°C for 5 minutes. The GSP-TAG, 0.5 mM dNTP, 5 mM MgCl<sub>2</sub>, 10 mM DTT, 40 U RNaseOUT, 100 U SuperScriptIII RT, and 240 ng Actinomycin D (Sigma) were added to the RNA for a the total 20  $\mu$ l reaction. Synthesis was performed at 50°C for 50 minutes and terminated at 85°C for 5 minutes. RT, with extremely low intrinsic RNase H activity (for cleavage of RNA from RNA/DNA duplexes), and Actinomycin D were added to prevent second strand cDNA RT resulting in antisense artifacts. After cDNA synthesis, 2 U of recombinant RNase H (Life Technologies) was added to each reaction and incubated for 20 minutes at 37°C. Afterward, gene and strand specific PCR was performed. PCR reactions were implemented with the EmeraldAmp GT PCR Master Mix (TAKARA) as described above (PCR analysis). To amplify sense and antisense cDNA, a TAG-primer and GSP sense (PCR) or a TAG-primer and GSP antisense (PCR) were used, respectively. We performed sense and antisense specific PCR using both sense and antisense cDNA of  $\beta$ -actin as an internal negative control that was previously demonstrated to have no antisense transcript (5). All cDNA products

were electrophoresed on 1% agarose gels, and visualized using Gel Red (Biotium). Primer sequence information is available in Supplemental Table 1.

### **Cell colony formation**

Equal numbers of cells were seeded into 6 well plates in triplicate. Cells were fixed with 3.7% formaldehyde in PBS and permeabilized with 100% methanol followed by staining with 1% crystal violet. After staining, cells were washed and dried completely. Crystal violet stained cells were quantified by Image J (NIH) or, solubilized and measured by absorbance (OD 590 nm)

### **Immunoprecipitation**

Cells were lysed in immunoprecipitation buffer (1% NP-40, 50 mM Tris-HCl, 500 mM NaCl and 5 mM EDTA) containing protease inhibitor cocktails (87785, Thermo Fisher) on ice for 30 minutes. Cell lysates (800  $\mu$ g) were incubated with 3  $\mu$ g of antibodies or normal IgG at 4°C overnight with rotary agitation. For immunoprecipitation of DDX3X, anti-DDX3X (sc-365768, Santa Cruz) antibody was used. Protein G agarose beads (11243233001, Roche) were added to the lysates and incubated for an additional 4 hours at 4°C with rotary agitation. The IP Beads were washed in immunoprecipitation buffer three times for 10 minutes each, to completely remove residual buffer, and boiled in SDS loading buffer for 10 minutes at 95°C for western blot analysis. For J2 immunoprecipitation, cells were fixed with 1 % formaldehyde prior to lysis of cells. Immunoprecipitation was performed with J2 antibody (10010200, Scicons) or normal IgG coupled to the protein G agarose beads.

### **Cytoplasmic and nuclear extractions**

Cytoplasmic and nuclear fractionations were performed, according to manufacturer's instructions (78833, Thermo Scientific).

## Flow cytometry

For tumor infiltrating leukocyte flow cytometry, tumors (0.5 g) were mechanically disrupted by chopping and then chemically digested using the Tumor Dissociation Kit (130-096-730, Miltenyi Biotec) and gentleMACS Dissociator (130-096-427, Miltenyi Biotec) according to manufacturer's instructions. Red blood cells were removed (10-548E, Lonza) from tumors and Fc receptors were blocked with anti-CD16/32 (101319, BioLegend) for 20 minutes on ice and then stained with appropriate antibodies for 1 hour on ice. Before flow cytometry analysis, cells were stained using the Zombie NIR Fixable Viability Kit (423105, BioLegend) to distinguish between live and dead cells. For OVA or HLA class expression on the cell surface, cells were detached with 2 mM EDTA in PBS and then washed twice using PBS before staining. Cells were stained with appropriate antibodies for 30 minutes on ice and then washed twice before flow cytometry analysis. Antibody information is provided in Supplemental Table 2. For J2 flow cytometry, cells were detached with 2 mM EDTA in PBS and then washed twice using PBS. Cells were fixed with 1x fixation buffer (424401, BioLegend) for 20 minutes at room temperature. After washing, cells were permeabilized with 0.1% Triton-X-100 in PBS for 15 minutes followed by incubation in 1% BSA in PBS for 30 minutes. Cells were stained with J2 antibody (10010200, Scicons) or mouse IgG2a isotype control (401501, BioLegend) for 1 hour at room temperature followed by anti-mouse IgG2 conjugated with APC secondary antibody.

## Supplementary References

1. Love MI, Huber W, Anders S. Moderated estimation of fold change and dispersion for RNA-seq data with DESeq2. *Genome Biol* **2014**;15:550
2. Subramanian A, Tamayo P, Mootha VK, Mukherjee S, Ebert BL, Gillette MA, *et al.* Gene set enrichment analysis: a knowledge-based approach for interpreting genome-wide expression profiles. *Proc Natl Acad Sci U S A* **2005**;102:15545-50

3. Ritchie ME, Phipson B, Wu D, Hu Y, Law CW, Shi W, *et al.* limma powers differential expression analyses for RNA-sequencing and microarray studies. *Nucleic Acids Res* **2015**;43:e47
4. Sergushichev AA. An algorithm for fast preranked gene set enrichment analysis using cumulative statistic calculation. *bioRxiv* **2016**:060012
5. Chen J, Sun M, Kent WJ, Huang X, Xie H, Wang W, *et al.* Over 20% of human transcripts might form sense-antisense pairs. *Nucleic Acids Res* **2004**;32:4812-20
